# Supplementary material for: Artifacts of Glory and Pain:Evolving Cultural Narratives on Confederate Symbolism and Commemoration in a New Era of Social Justice, a Personal Perspective
Source: Preprints.org preprint supplement (doi:10.20944/preprints202407.2271.v1), 2024-07-30
Supplement: Supplementary file 1 [file supplementary]

Brief Bio statement:

John H. Jameson is retired from U.S. National Park Service where he was a recipient of the Sequoia Award for career achievements. His work has encompassed a broad range of projects in cultural heritage management, preservation, and interpretation in several regions of the United States and Europe. He is a founding member of the ICOMOS Interpretation and Presentation Committee, and more recently, the UNESCO Working Group on interpretation standards. He has edited and contributed to several seminal works on cultural heritage public interpretation.
